# Supplementary material for: The p47phox- and NADPH oxidase organiser 1 (NOXO1)-dependent activation of NADPH oxidase 1 (NOX1) mediates endothelial nitric oxide synthase (eNOS) uncoupling and endothelial dysfunction in a streptozotocin-induced murine model of diabetes
Source: Springer Nature journal article supplement (doi:10.1007/s00125-012-2557-6), 2012-05-01
Supplement: 125_2012_2557_MOESM1_ESM.pdf [file 125_2012_2557_MOESM1_ESM.pdf]

**ESM Table 1. Target sequences for siRNAs**

| <b>Name</b>                        | <b>Sequences (5'-&gt;3')</b> |
|------------------------------------|------------------------------|
| <i>Nox1</i>                        | GCUGGUGGCUGGUGACGAAU         |
| <i>Nox4</i>                        | CAUGCUGCUGCUGUUGCAUGUUUCA    |
| <i>Noxo1</i>                       | AACGGUGAGGGUGGACUCUGACCUU    |
| <i>Mt III (domain Rieske Fe-S)</i> | AAUGCCGUCACCCAGUUCGUU        |
