# Supplementary material for: The p47phox- and NADPH oxidase organiser 1 (NOXO1)-dependent activation of NADPH oxidase 1 (NOX1) mediates endothelial nitric oxide synthase (eNOS) uncoupling and endothelial dysfunction in a streptozotocin-induced murine model of diabetes
Source: Springer Nature journal article supplement (doi:10.1007/s00125-012-2557-6), 2012-05-01
Supplement: 125_2012_2557_MOESM2_ESM.pdf [file 125_2012_2557_MOESM2_ESM.pdf]

# ESM Fig. 1

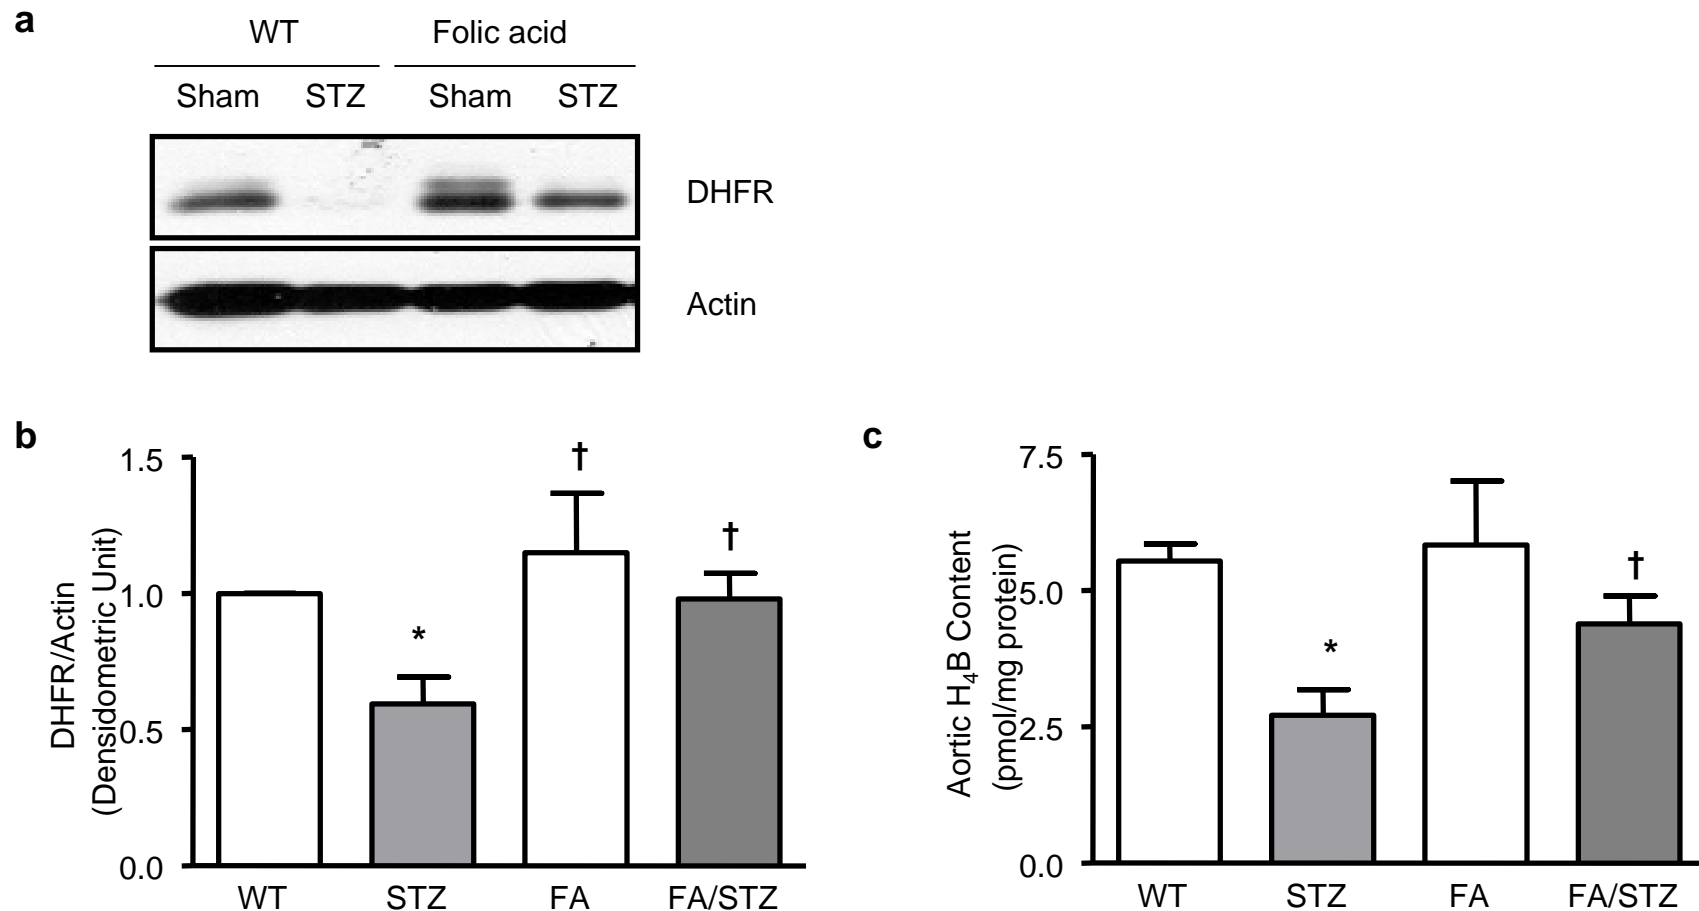

**ESM Fig. 1. Oral administration of folic acid restores DHFR abundance and H<sub>4</sub>B content in diabetes.** C57BL/6 mice were orally administered with folic acid (FA, 15 mg/kg/day) for 2 days prior to induction of diabetes with streptozocin (STZ, 100 mg/kg/day, 3 days), and throughout the study period of 7 days. By day 7, aortas were harvested for analysis of DHFR abundance and H<sub>4</sub>B content. **a** representative western blot for DHFR; **b** quantified grouped data for DHFR protein levels; **c** H<sub>4</sub>B content as determined by HPLC analysis (see Methods section). \* $p < 0.05$  vs. WT, † $p < 0.05$  vs. diabetic ( $n = 4$ ).
